# Supplementary material for: Cerium vanadate hollow sphere-mediated polysulfide immobilization and conversion toward lithium–sulfur batteries
Source: Royal Society of Chemistry journal article supplement (doi:10.1039/d5cc06753g), 2026-01-01
Supplement: d5cc06753g1.pdf [file d5cc06753g1.pdf]

Electronic Supplementary Information (ESI)

**Cerium vanadate hollow spheres mediated polysulfide immobilization  
and conversion toward lithium-sulfur batteries**

Xiang Wu,<sup>a</sup> Jingshuai Xiao,<sup>a</sup> Xuyang Cai,<sup>a</sup> Jiazhuang Chen,<sup>a</sup> Xiao Sun,<sup>a</sup> Tengfei Yang,<sup>a</sup> Yanxia Liu,<sup>b</sup> Xiang Li,<sup>a</sup> Yan Song,<sup>\*a</sup> and Chaozheng He<sup>\*a</sup>

<sup>a</sup> Shaanxi Key Laboratory of Optoelectronic Functional Materials and Devices, School of Materials Science and Chemical Engineering, Xi'an Technological University, Xi'an, 710021, China.

<sup>b</sup> Institute of Science and Technology for New Energy, Xi'an Technological University, Xi'an 710021, China.

<sup>\*</sup>Corresponding authors: E-mail: songyan@xatu.edu.cn, hecz2019@xatu.edu.cn

## Experimental

### Synthesis of CeVO<sub>4</sub> hollow spheres and sulfur cathodes

Ce(NO<sub>3</sub>)<sub>3</sub>·6H<sub>2</sub>O (1 mmol) was dissolved in deionized water under magnetic stirring until a clear solution was formed. Subsequently, 500 mg polyvinyl pyrrolidone (PVP) and 1.5 g urea were added sequentially, with each component stirred at room temperature for 30 minutes. The resulting solution was transferred to a 50 mL Teflon-lined autoclave and maintained at 120 °C for 3 h. After cooling to room temperature, the products were collected and washed with deionized water and ethanol, after cooling to room temperature, the products were collected, washed with deionized water and ethanol, and then redispersed in deionized water for further use.

1.0 mmol of NH<sub>4</sub>VO<sub>3</sub> was added to the above solution and transferred to a 50 mL Teflon-lined autoclave. The mixture maintained at 180 °C for 12 h, followed by natural cooling to room temperature. the products were collected and washed with deionized water and absolute ethanol, and finally dried at 80 °C overnight.

The CeVO<sub>4</sub>-S composite was synthesized via a melt-diffusion method. Briefly, CeVO<sub>4</sub> and sulfur powders were thoroughly ground at a weight ratio of 1:4 and then heated at 155 °C for 12 h.

### Synthesis of Li<sub>2</sub>S<sub>6</sub> solution

The Li<sub>2</sub>S<sub>6</sub> solution was obtained by dissolving elemental sulfur and Li<sub>2</sub>S at a molar ratio of 5:1 in a mixed solvent of 1,2-dimethoxyethane (DME) and 1,3-dioxolane (DOL) (v/v = 1:1), followed by continuous stirring at 60 °C for 12 h.

### Materials characterization

The crystal structure was characterized by X-ray diffraction system (XRD, Bruker D8). Meanwhile, the surface chemical composition of was characterized by X-ray photoelectron spectroscopy (XPS, an ESCALAB 250Xi spectrometer). The surface

morphology of the electrode was characterized by scanning electron microscope (SEM, JSM-7610F). The microstructure of the electrode was characterized by Transmission electron microscope (TEM, JEM-2100). The specific surface areas and pore volumes of all samples were measured by the Brunauer-Emmett-Teller (BET) method using nitrogen adsorption and desorption isotherms on a Micromeritics (JW-BK122-B, JWGB SCI. & Tech).

### **Battery assembly and electrochemical measurements**

The cathode was fabricated by mixing  $\text{CeVO}_4\text{-S}$  (with a sulfur content of 80 wt%), conductive carbon (Super P), and polyvinylidene fluoride (PVDF) at a mass ratio of 7:2:1 in 1-methyl-2-pyrrolidinone (NMP) to form a homogeneous slurry. The slurry was uniformly coated onto aluminum foil and punched into disks with a diameter of 12 mm to obtain sulfur cathodes. The electrodes were then dried under vacuum at 60 °C overnight. The active sulfur loading was about 2 mg cm<sup>-2</sup>. A high-sulfur-loading cathode with a sulfur loading of 4.7 mg cm<sup>-2</sup> was fabricated by regulating the coating thickness. As a comparison, pure S cathode were prepared as described above in the same way (omitting the step of adding catalyst).

The 2032 type coin cells were assembled in an Ar-filled glove box, using active sulfur as the cathode, lithium metal foil as the anode, and Celgard 2400 as the separator. The electrolyte consists of a solution of 1,3-dioxolane (DOL) and dimethyl ether (1:1 by volume) containing 1 M lithium dilithium (trifluoromethane sulfonyl) imide (LiTFSI) and 1wt%  $\text{LiNO}_3$ . The electrolyte intake is approximately 40  $\mu\text{L}$  in per coin battery. Galvanostatic charge–discharge tests were carried out using a Neware battery testing system within a voltage range of 1.7-2.8 V. Cyclic voltammetry (CV) and electrochemical impedance spectroscopy (EIS) measurements were performed using a CHI660E electrochemical workstation. The EIS tests were conducted over a frequency

range of 100 kHz to 0.01 Hz with an amplitude of 5 mV. During the GITT measurement, the cell was discharged at a rate of 0.1 C for 15 minutes, followed by a 1 h relaxation period. This procedure was repeated until the voltage dropped below 1.7 V, indicating the completion of the discharge process. During charging, the cell was charged at a rate of 0.1 C for 15 minutes, followed by a 1 h relaxation period, and the cycle was continued until the voltage exceeded 2.8 V.

## Supplementary Figures

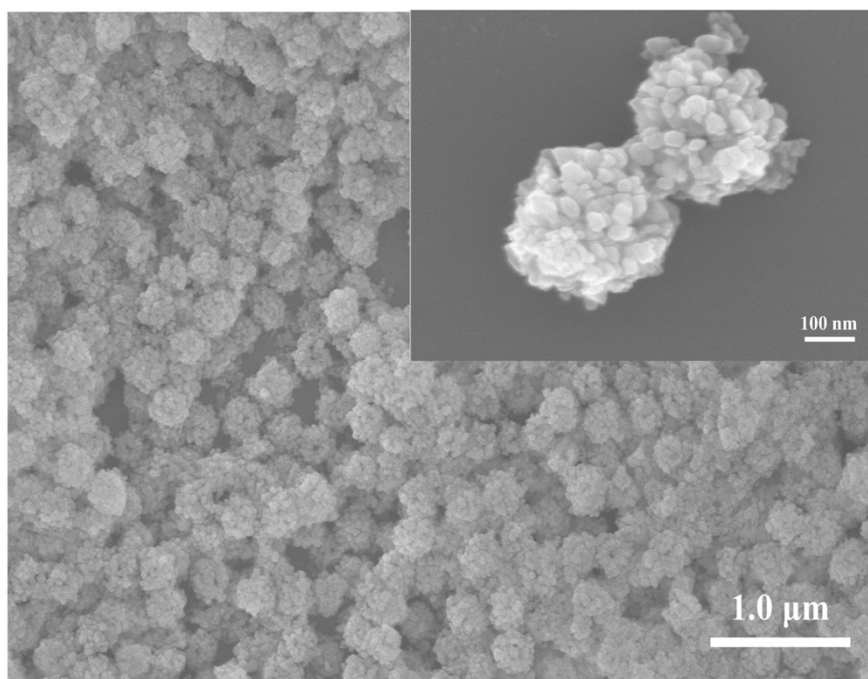

**Fig. S1** SEM images of  $\text{CeVO}_4$ .

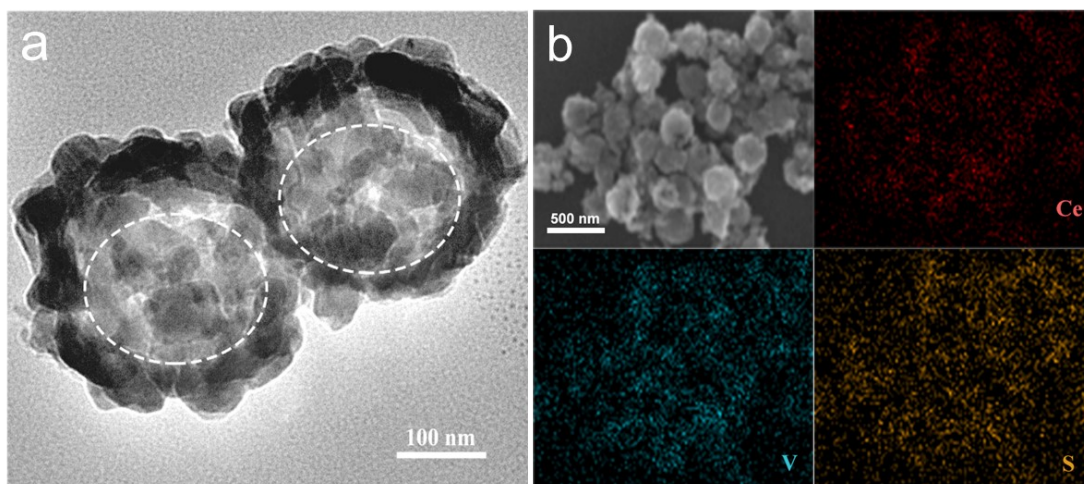

**Fig. S2** (a) TEM and (b) EDS elemental mapping images of the  $\text{CeVO}_4\text{-S}$ .

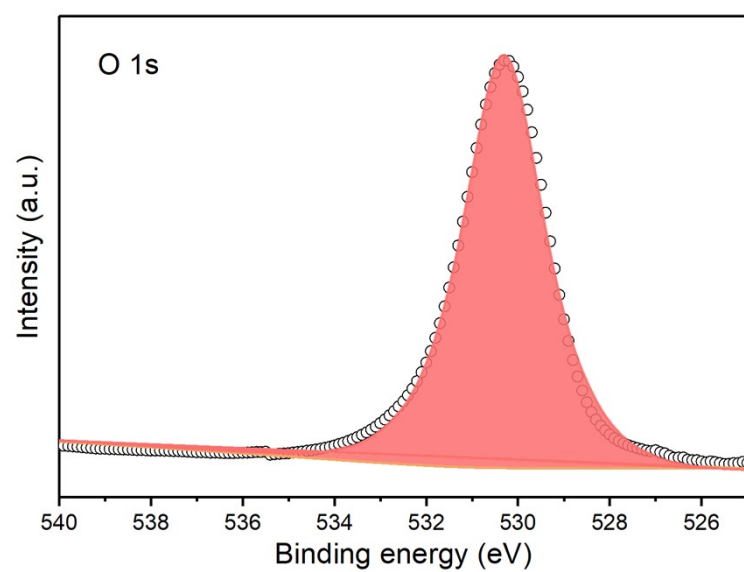

**Fig. S3** O 1s high-resolution XPS spectrum of CeVO<sub>4</sub>.

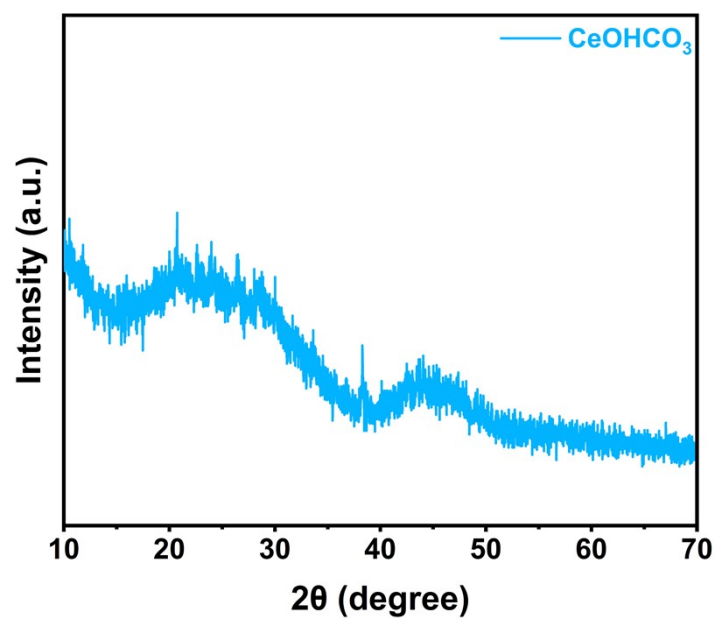

**Fig. S4** XRD pattern of the  $\text{CeOHCO}_3$ .



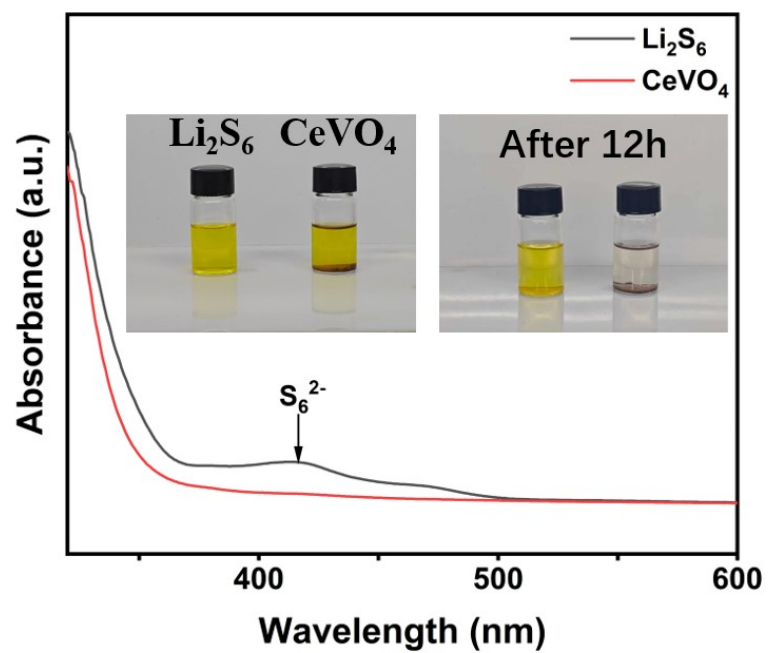

**Fig. S5** UV-vis spectra of  $\text{Li}_2\text{S}_6$  solution before and after adsorbed by  $\text{CeVO}_4$ . Inset: digital photographs of  $\text{Li}_2\text{S}_6$  adsorption test.

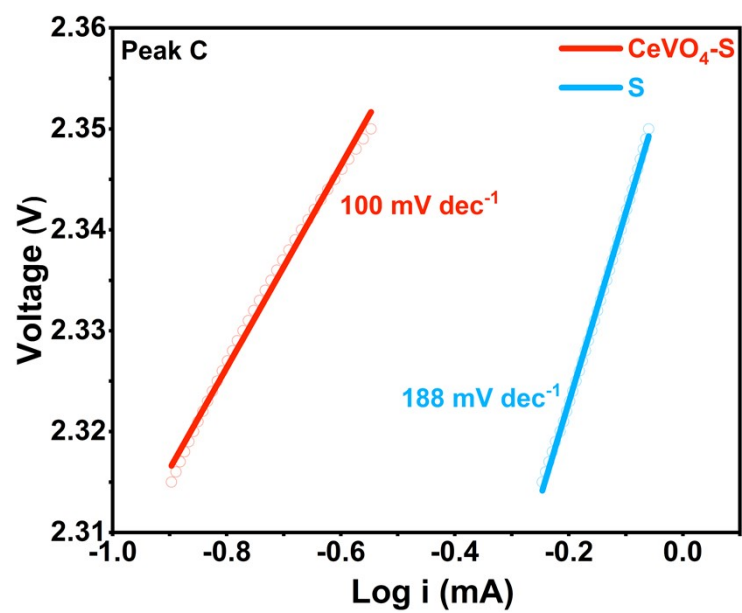

**Fig. S6** Corresponding Tafel plots from the CV curves.

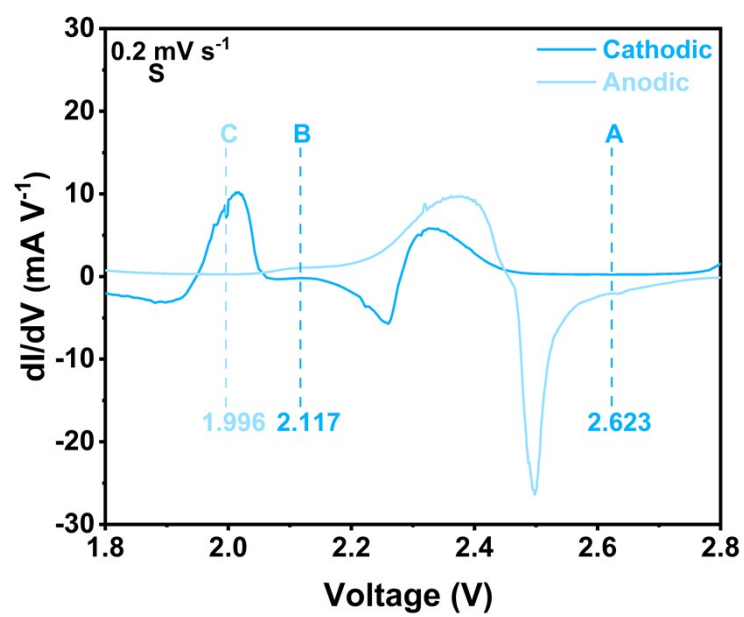

**Fig. S7** Differential CV curves of batteries assembled with S cathodes

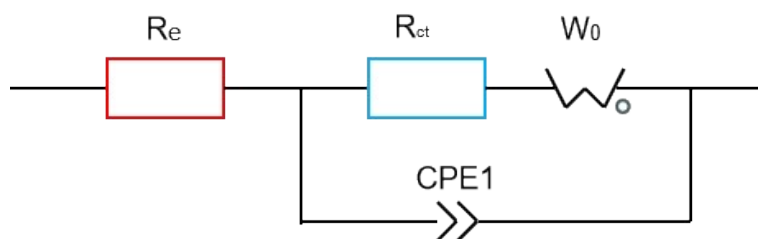

**Fig. S8** The well-fitted Randles EIS equivalent circuits.

**Note:** The meaning of each component in the diagram is shown below:  $R_e$ : The internal resistance of the electrolyte;  $R_{ct}$ : The charge-transfer resistance, related to the electrode reaction kinetics; CPE1: Capacitance of the electrode bulk in high-frequency region;  $W_o$ : The semi-infinite Warburg diffusion impedance.

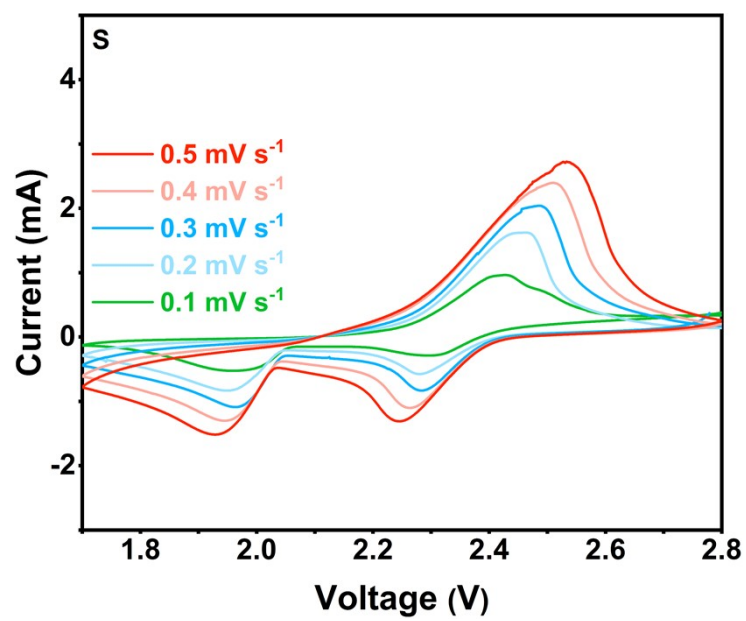

**Fig. S9** Cyclic voltammetry curves of batteries assembled with S cathodes.

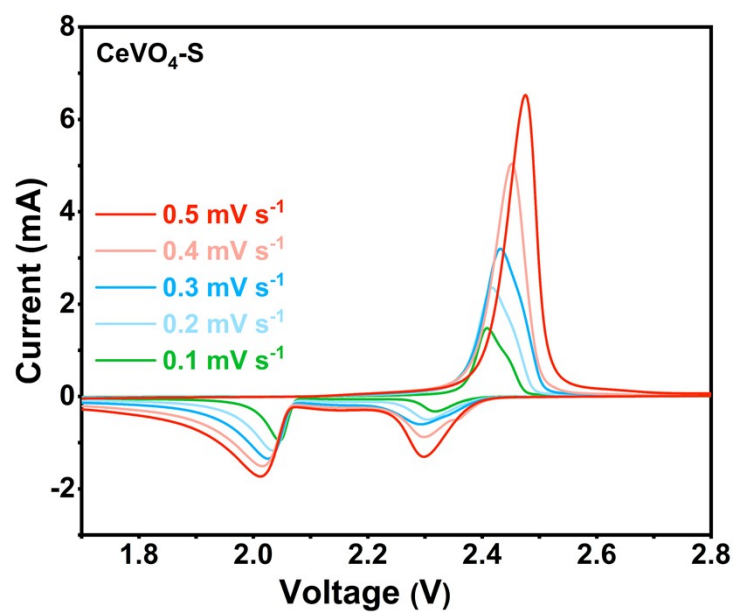

**Fig. S10** Cyclic voltammetry curves of batteries assembled with  $\text{CeVO}_4\text{-S}$  cathodes.

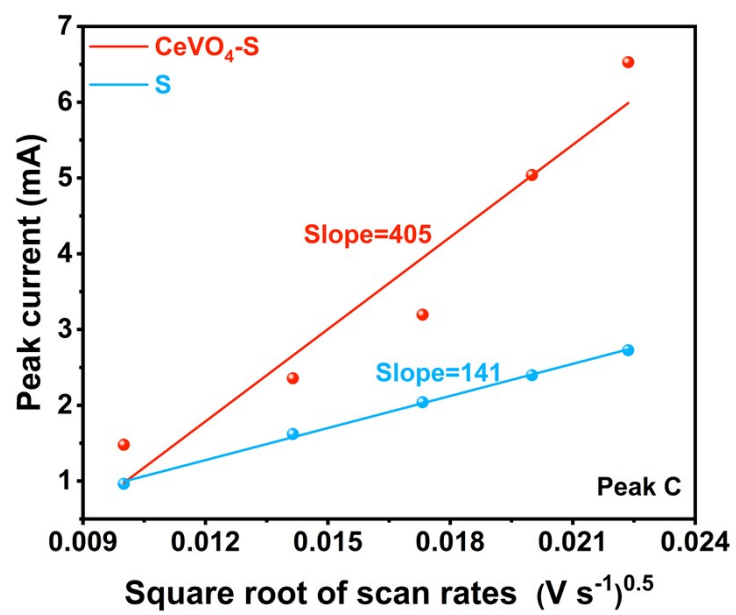

Fig. S11 The peak C current versus the square root of scan rates.

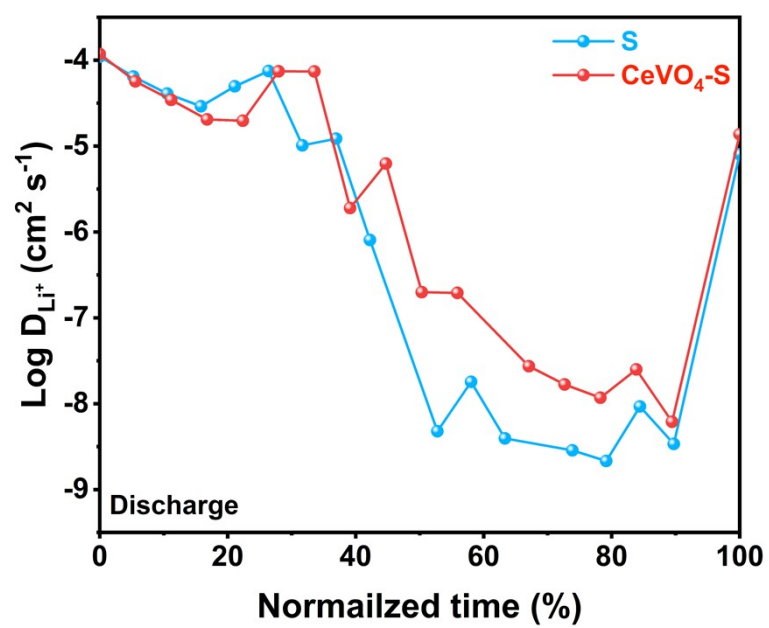

Fig. S12  $\text{Li}^+$  transport coefficient during the discharge process



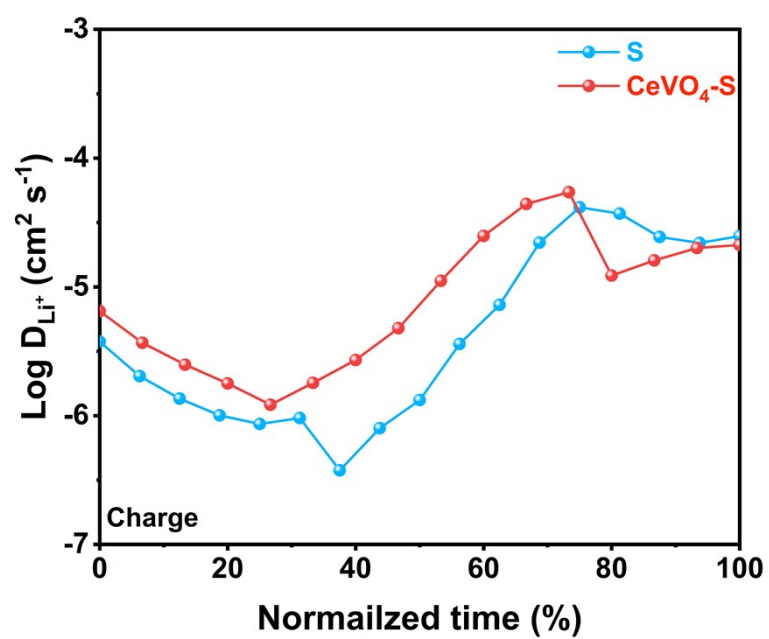

**Fig. S13**  $\text{Li}^+$  transport coefficient during the charge process

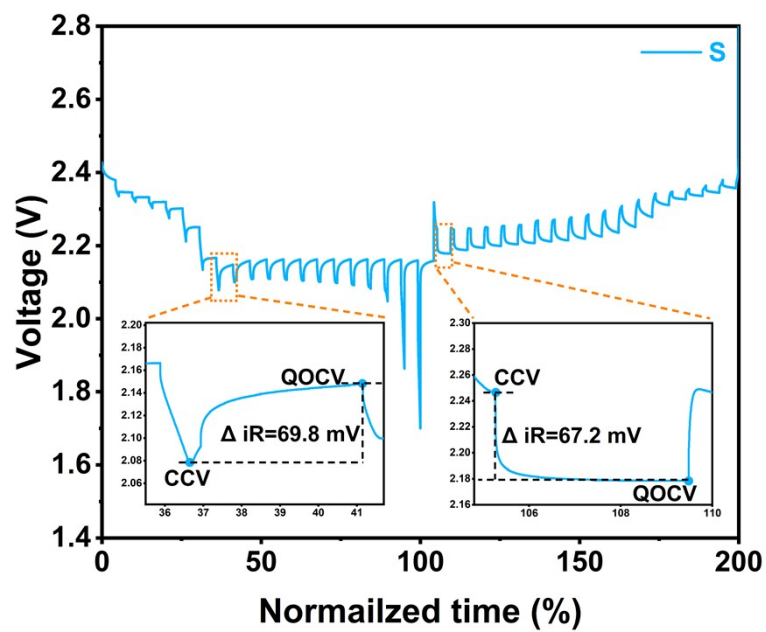

**Fig. S14** GITT profiles of the S cathode during the charge and discharge processes

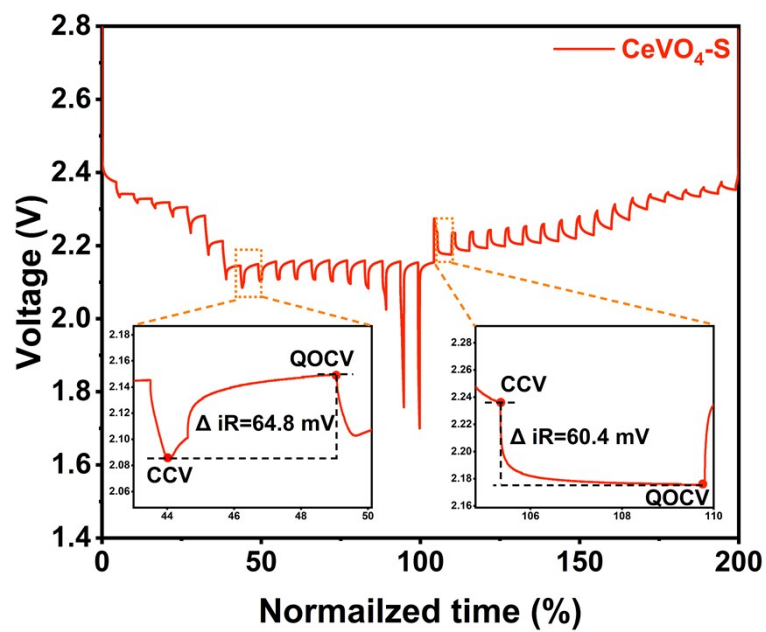

**Fig. S15** GITT profiles of the  $\text{CeVO}_4\text{-S}$  cathode during the charge and discharge processes

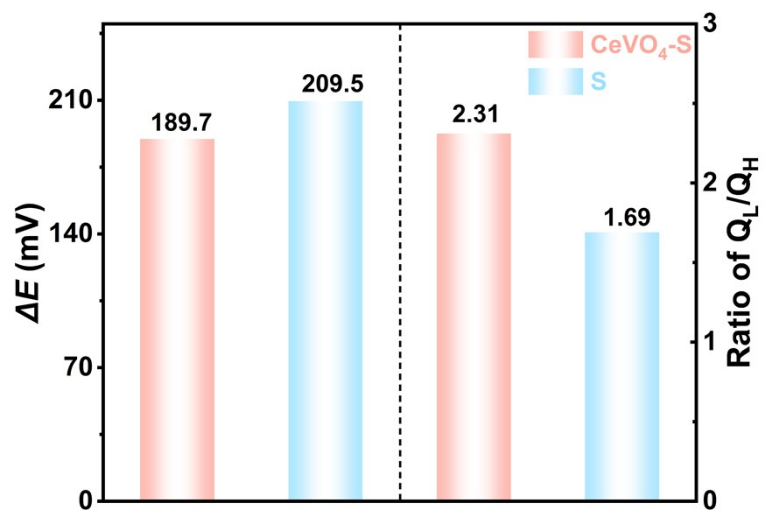

**Fig. S16** Comparison of the corresponding  $\Delta E$  and  $Q_L/Q_H$  at 0.2 C.

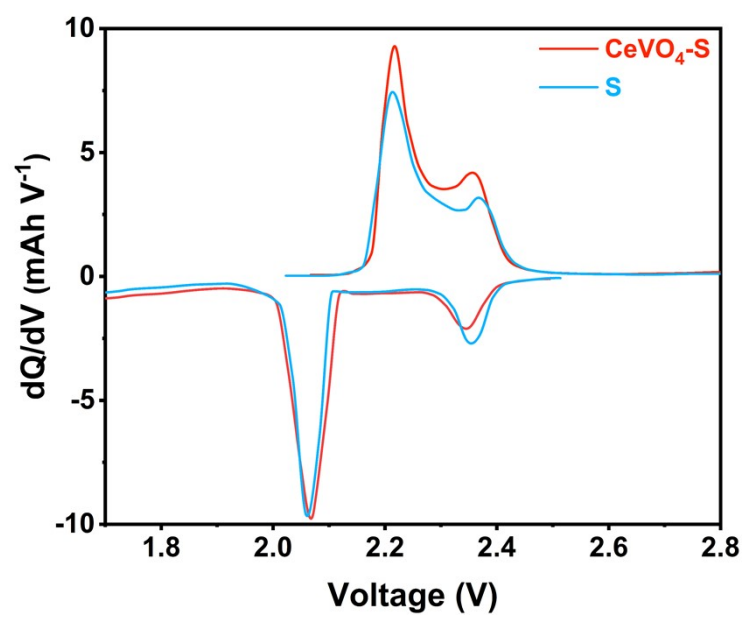

Fig. S17 Differential capacity ( $dQ/dV$ ) curves at 0.2 C.

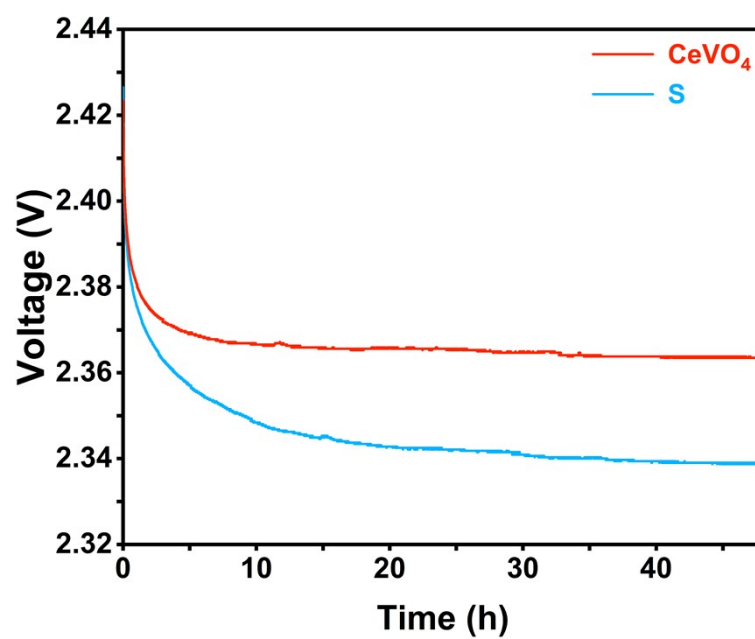

**Fig. S18** Open-circuit voltage profiles after resting for 2 days following 5 cycles.

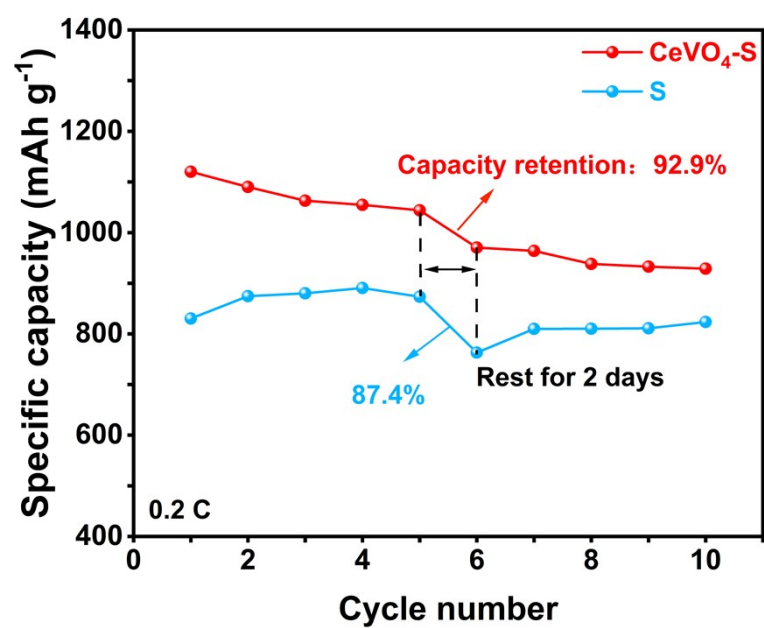

**Fig. S19** Self-discharge performance of the Li-S batteries with  $\text{CeVO}_4\text{-S}$  and S cathodes.

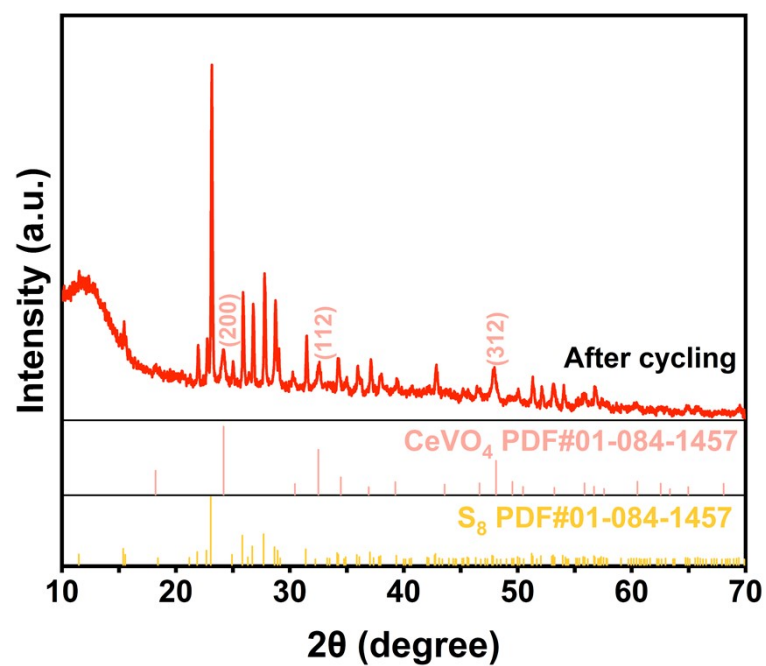

**Fig. S20** XRD pattern of the  $\text{CeVO}_4\text{-S}$  cathode after cycles.



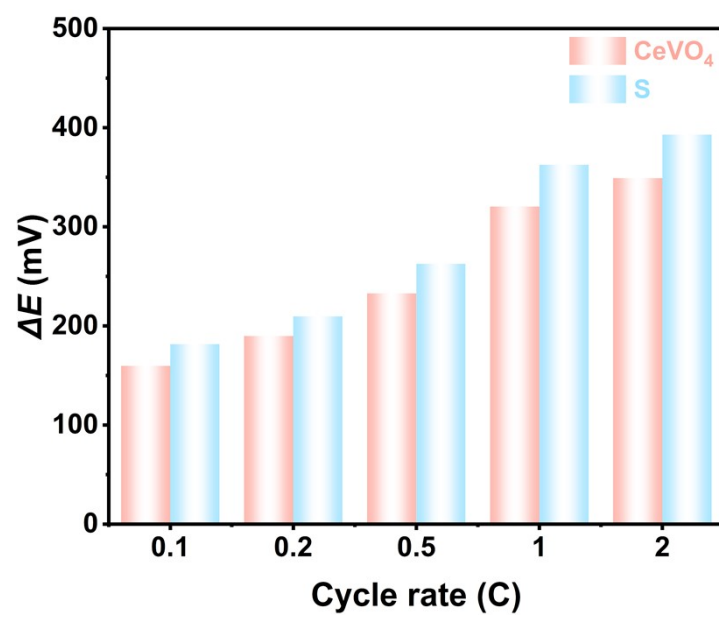

**Fig. S21** Comparing the corresponding  $\Delta E$  at 0.1-2 C.

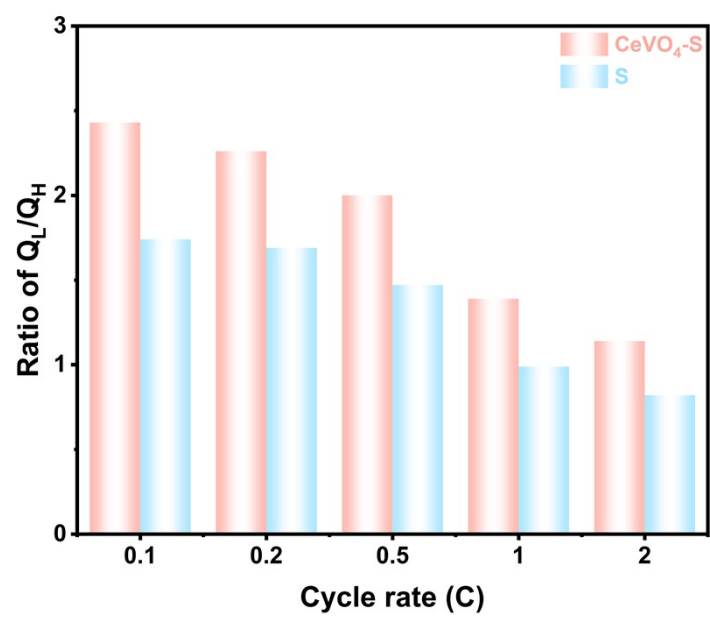

**Fig. S22** Comparing the corresponding  $Q_L/Q_H$  at 0.1-2 C.

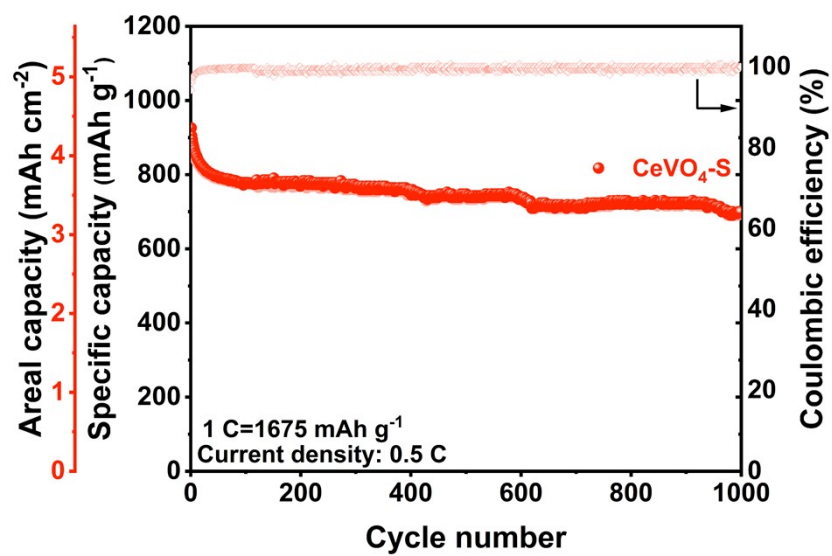

**Fig. S23** Cycles performance of the  $\text{CeVO}_4\text{-S}$  cathode over 1000 cycles at 0.5 C with a sulfur loading of  $4.7 \text{ mg cm}^{-2}$ .

**Table S1** Comparison of Performance of Advanced Li-S Battery Catalysts.

| Materials                          | Sulfur loading<br>(mg cm <sup>-2</sup> ) | Initial capacity<br>(mAh g <sup>-1</sup> ) | Rate<br>(C) | Cycle number | Decay rate | Ref.                   |
|------------------------------------|------------------------------------------|--------------------------------------------|-------------|--------------|------------|------------------------|
| CeVO <sub>4</sub> -S               | 2.0                                      | 1114                                       | 0.2         | 900          | 0.027%     | This work <sup>1</sup> |
| YHS@C                              | 2.1                                      | 912.5                                      | 0.5         | 200          | 0.038%     |                        |
| S/rGO-La(OH) <sub>3</sub>          | 2.8                                      | 1160                                       | 0.2         | 100          | 0.222%     | 2                      |
| Sm <sub>2</sub> O <sub>3</sub> /CA | 2.2                                      | 1322                                       | 0.2         | 300          | 0.115%     | 3                      |
| MWCNTs/CeO <sub>2</sub>            | 1.8-2.0                                  | 898                                        | 0.2         | 300          | 0.140%     | 4                      |
| CeF <sub>3</sub> -20/CF            | 1.6                                      | 1015                                       | 0.2         | 100          | 0.064%     | 5                      |
| GB-Y                               | 0.6                                      | 1201.5                                     | 0.2         | 100          | 0.297%     | 6                      |
| NCFI@T <sub>150</sub>              | 1.5                                      | 1127                                       | 0.2         | 200          | 0.090%     | 7                      |

## References

1. P. Zeng, M. Chen, J. Luo, H. Liu, Y. Li, J. Peng, J. Li, H. Yu, Z. Luo, H. Shu, C. Miao, G. Chen and X. Wang, *ACS Appl. Mater. Interfaces*, 2019, **11**, 42104–42113.
2. Y. Tian, Y. Zhao, Y. Zhang, L. Ricardez-Sandoval, X. Wang and J. Li, *ACS Appl. Mater. Interfaces*, 2019, **11**, 23271–23279.
3. H. Sheng, X. Li, B. Huang, J. Wang, X. Li and Y. Hua, *ChemPlusChem*, 2019, **84**, 838–844.
4. W. Zhu, Z. Zhang, J. Wei, Y. Jing, W. Guo, Z. Xie, D. Qu, D. Liu, H. Tang and J. Li, *J. Membr. Sci.*, 2020, **597**, 117646.
5. K. Zou, N. Li, X. Dai, W. Jing, M. Shi, C. Lu, Q. Tan, Y. Xin, J. Sun, Y. Chen and Y. Liu, *ACS Appl. Nano Mater.*, 2020, **3**, 5732–5742.
6. F. Zhou, Y. Mei, Q. Wu, H. Li, J. Xu and H. Chen, *Energy Storage Mater.*, 2024, **67**, 103315.
7. S. Yang, D. Jiang, Q. Su, S. Yuan, Y. Guo, K. Duan, M. Xiang, J. Guo, W. Bai and S. Chou, *Adv. Energy Mater.*, 2024, **14**, 2400648.
